# Supplementary material
Source: PubMed Central journal article supplement (PMC6459778)

A)

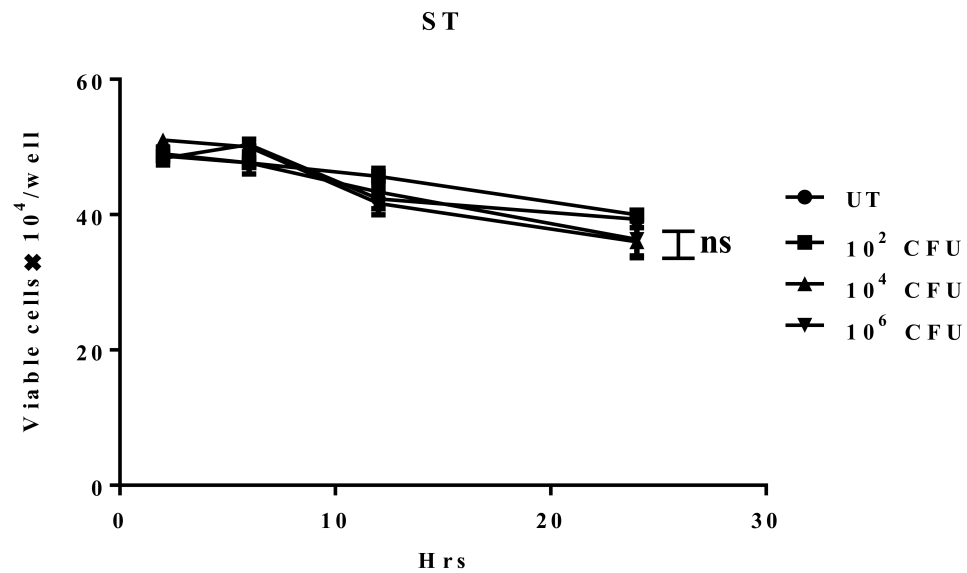

B)

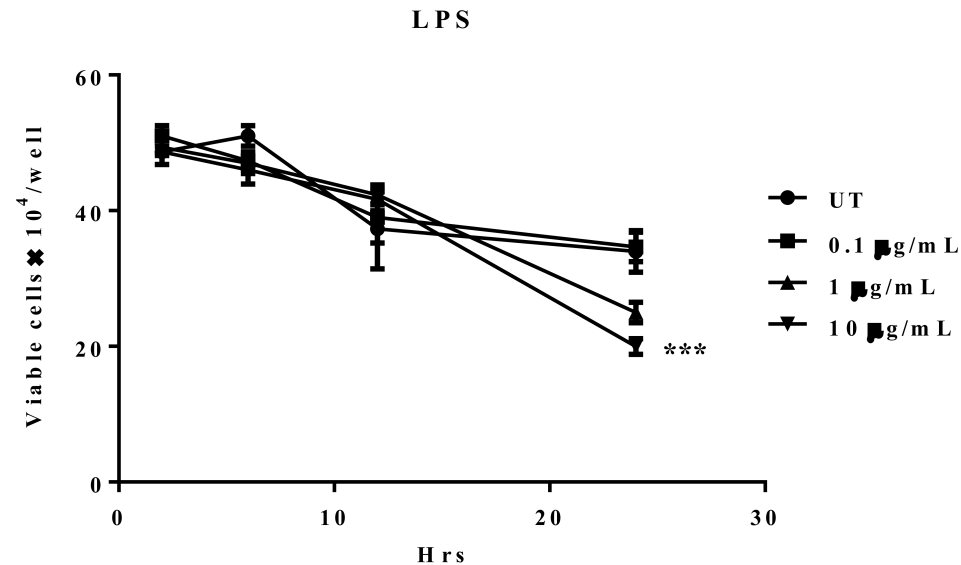

C)

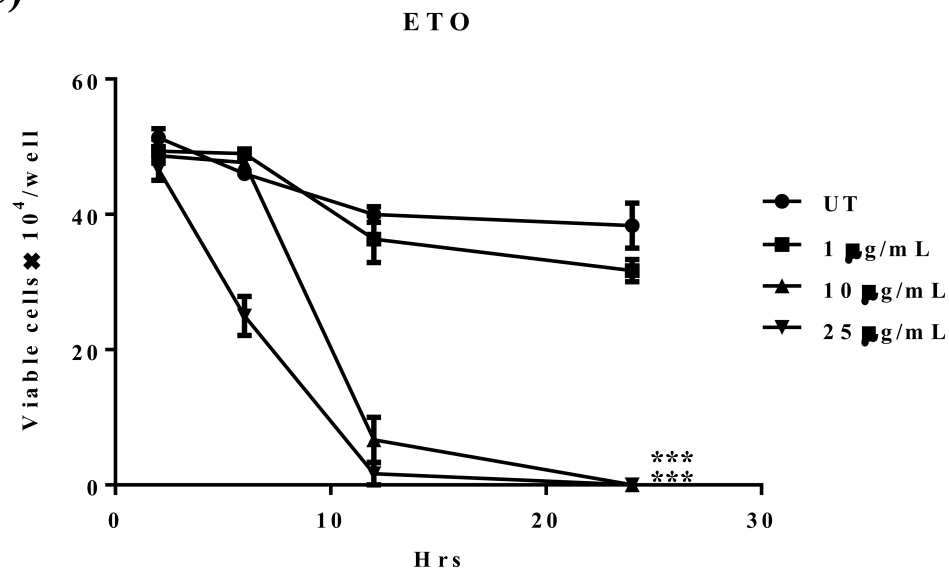

D)

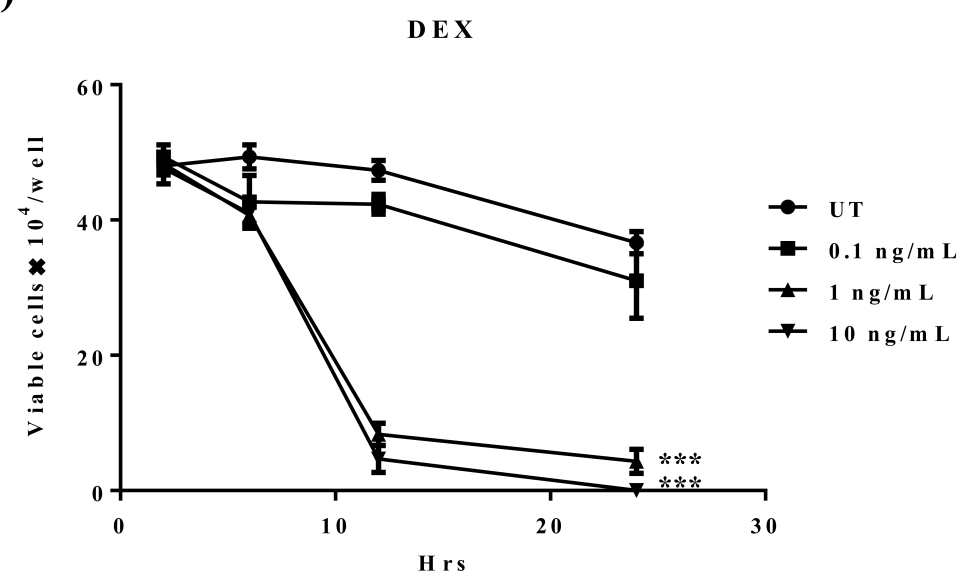

Supplementary Figure 1

Supplement: IMM-157-21-s001.pdf [file IMM-157-21-s001.pdf]

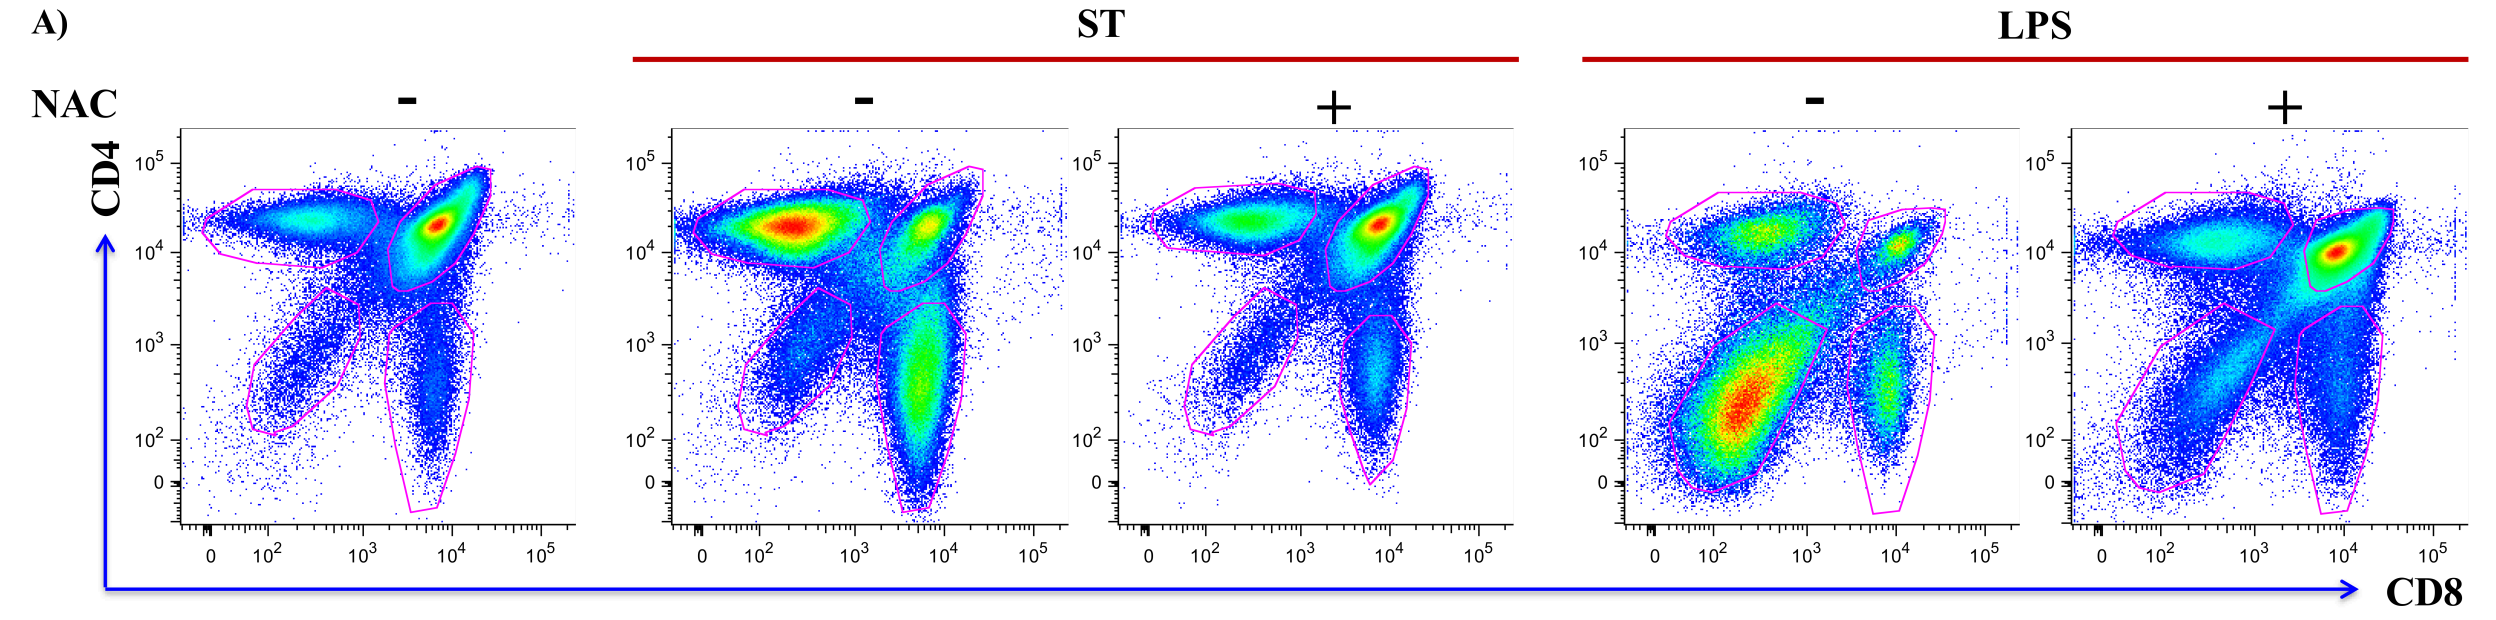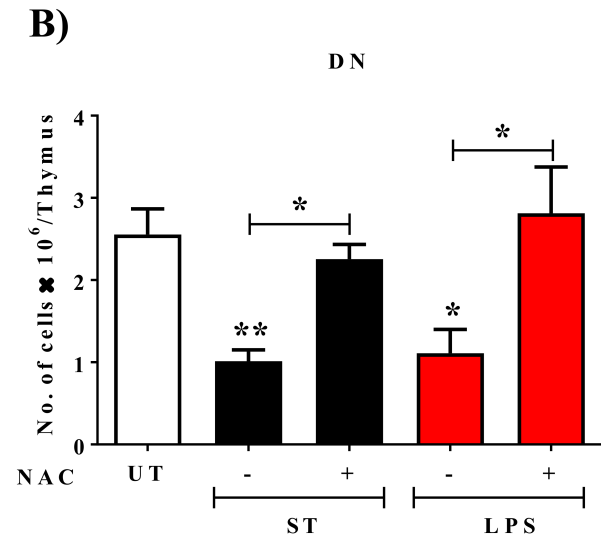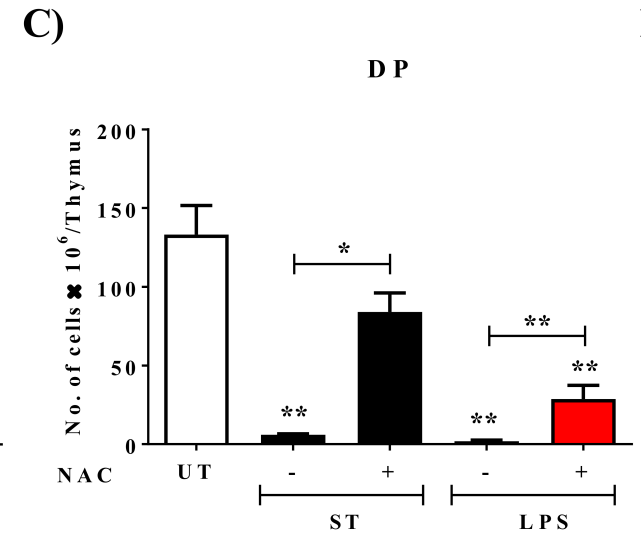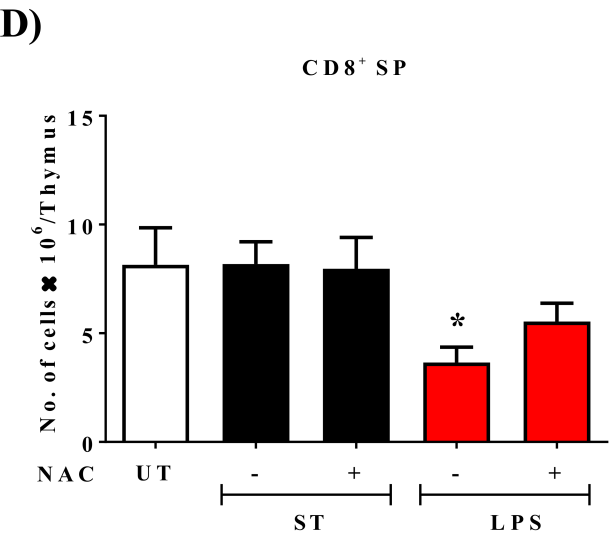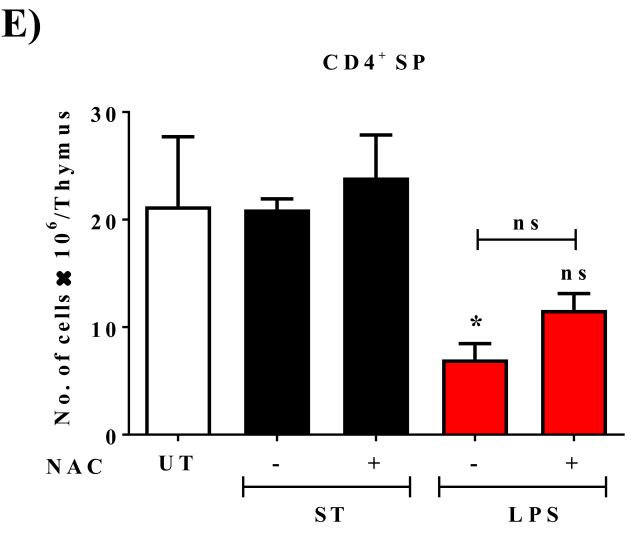

**Supplementary Figure 2**

Supplement: IMM-157-21-s002.pdf [file IMM-157-21-s002.pdf]

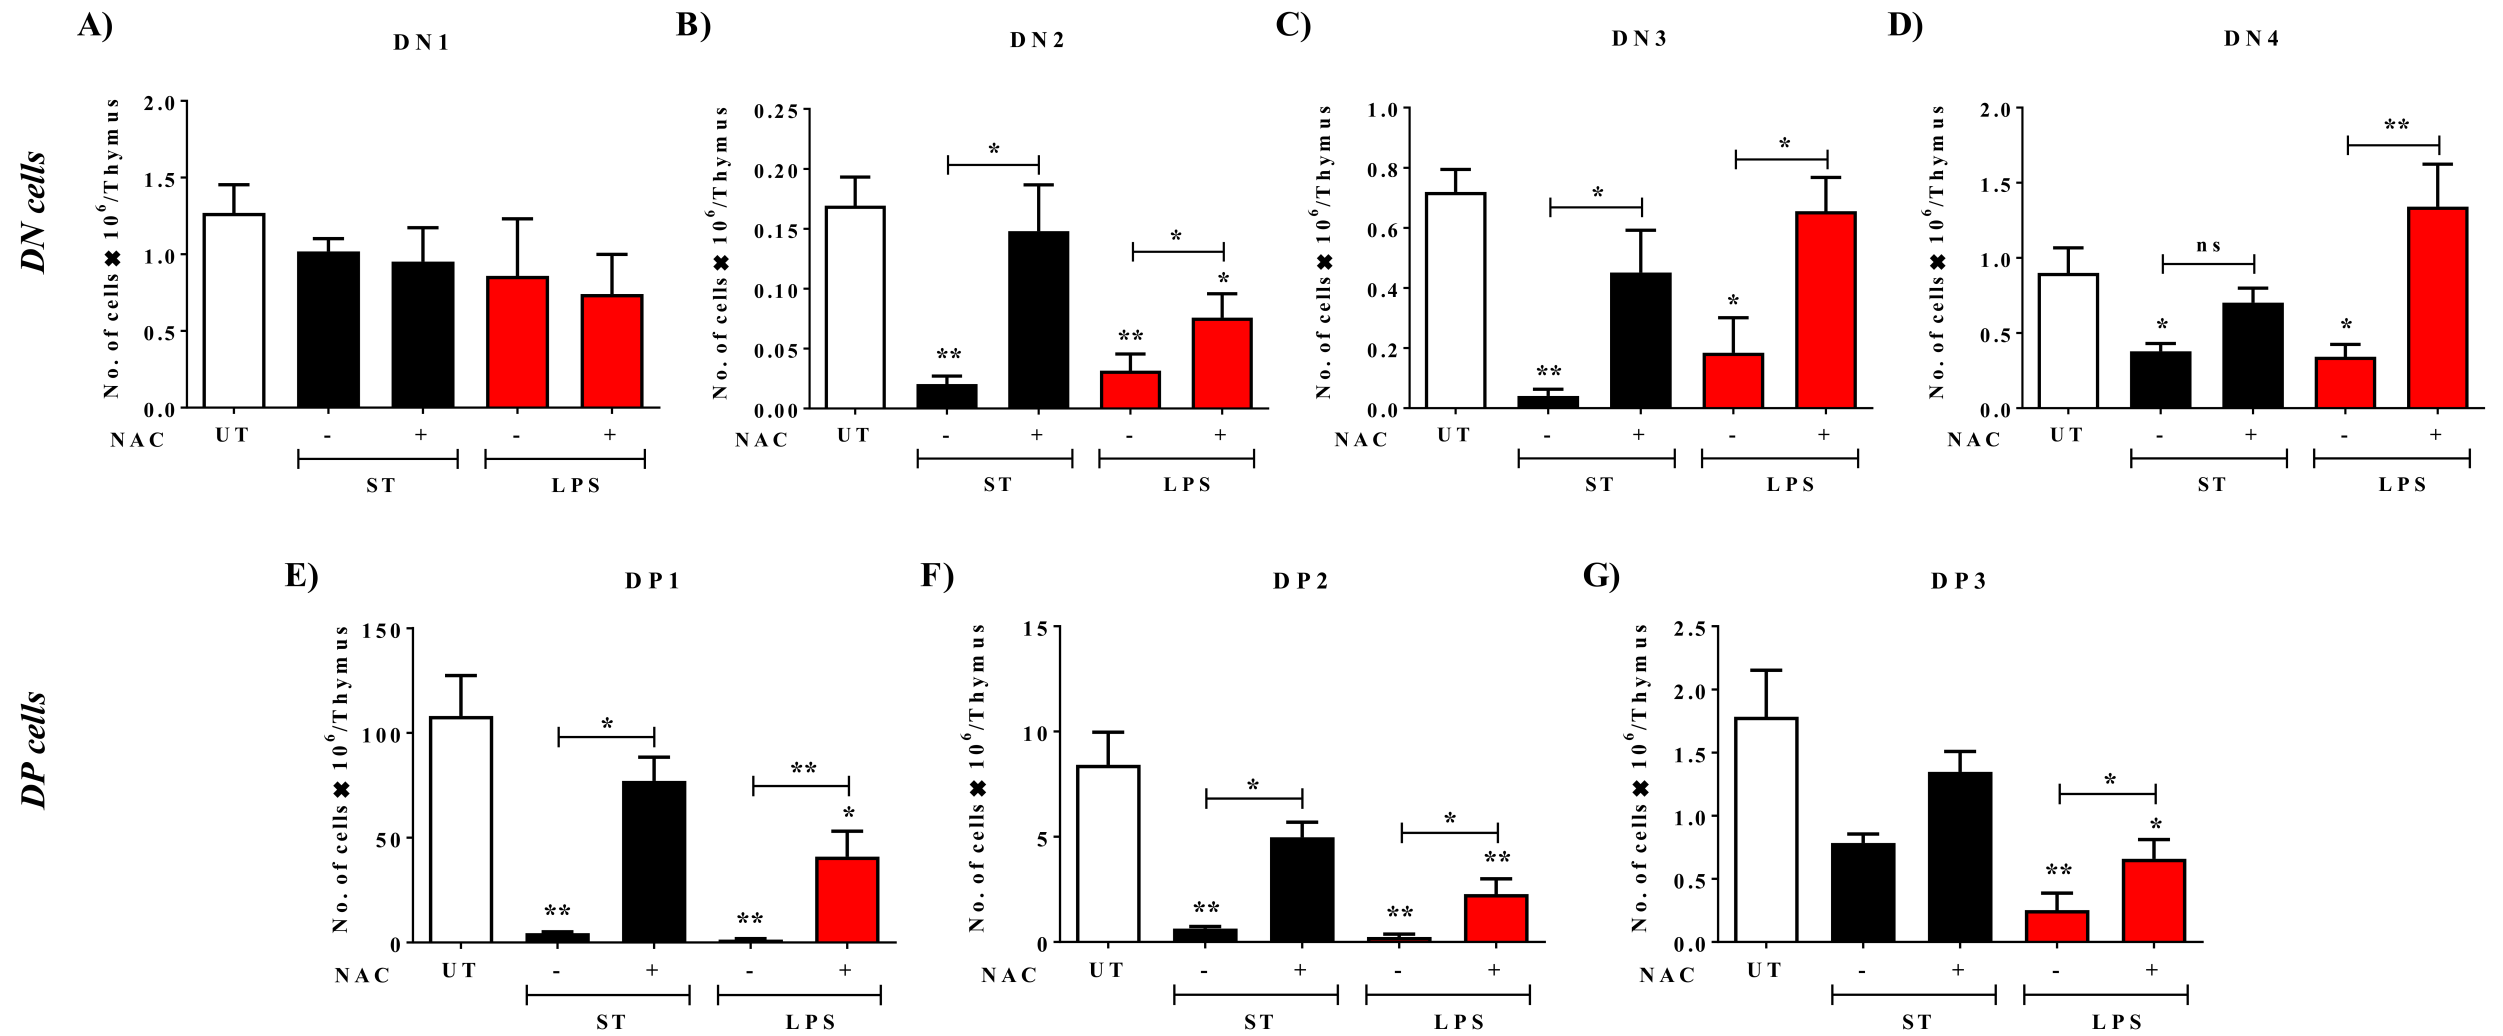

**Supplementary Figure 3**

Supplement: IMM-157-21-s003.pdf [file IMM-157-21-s003.pdf]

*CD8+ SP cells*

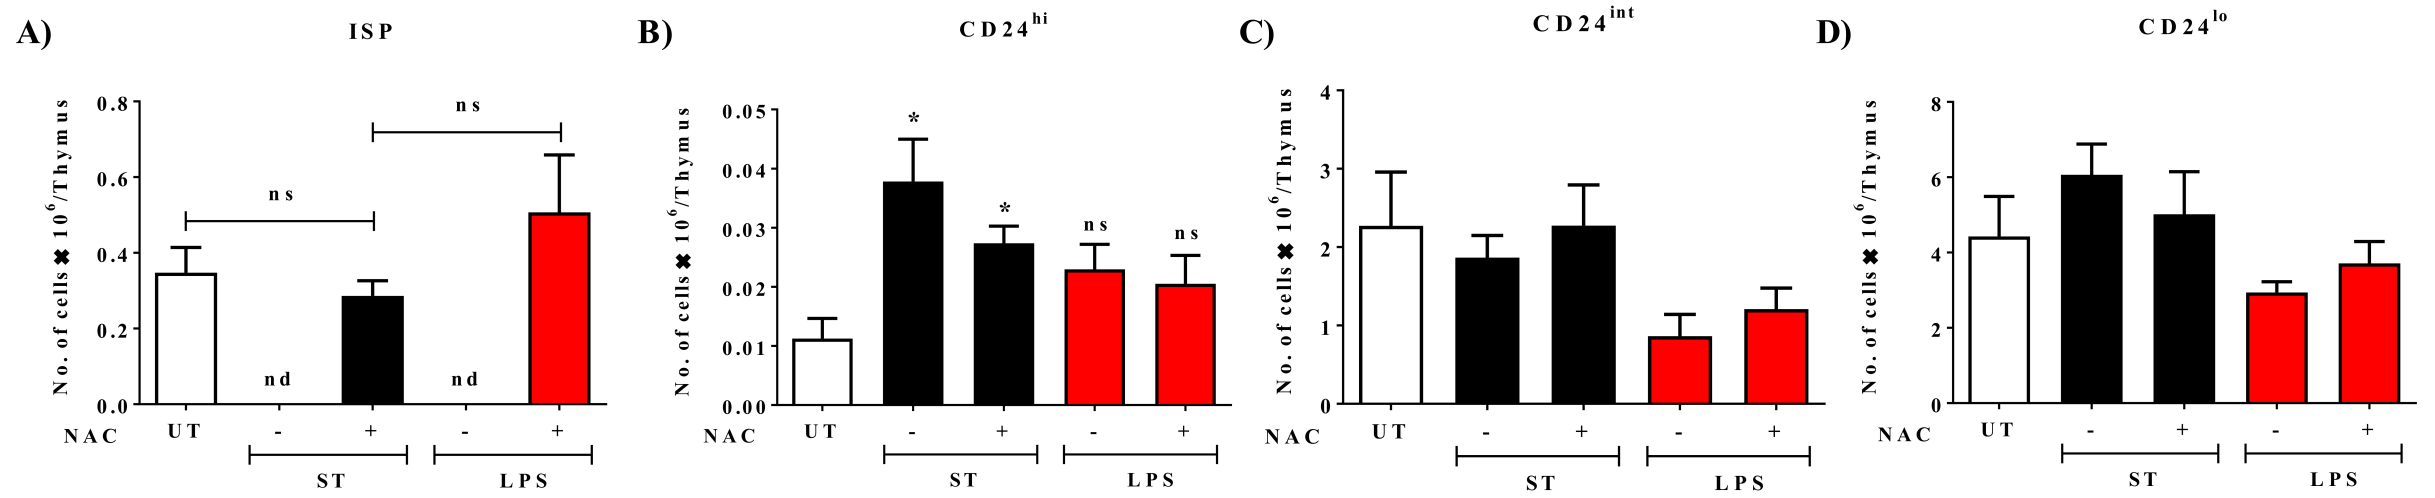

*CD4+ SP cells*

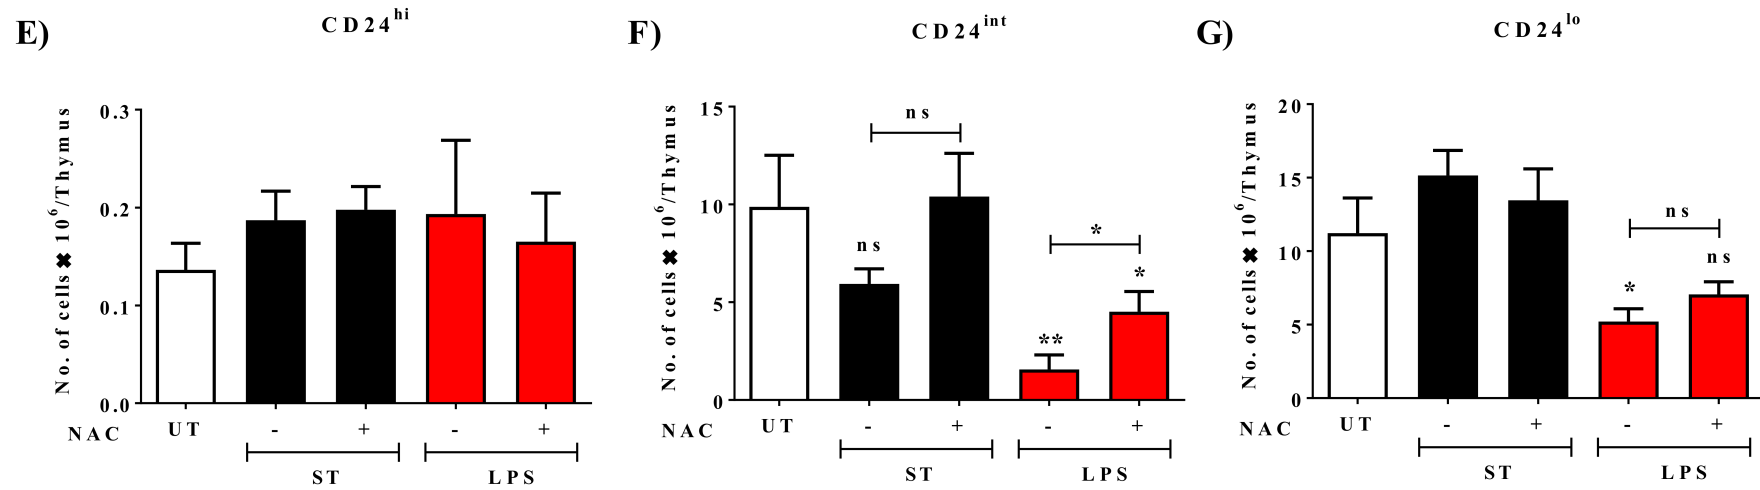

**Supplementary Figure 4**

Supplement: IMM-157-21-s004.pdf [file IMM-157-21-s004.pdf]
